# Supplementary material for: Impact of COVID-19 pandemic on the PREDIMED-Plus randomized clinical trial: Effects on the interventions, participants follow-up, and adiposity
Source: Frontiers journal article supplement (doi:10.3389/fnut.2022.1098269), 2023-01-12
Supplement: Data_Sheet_1.pdf [file Data_Sheet_1.pdf]

## *Supplementary Material*

- **Supplemental Material**
  - **Supplemental Material 1. Questionnaire to assess the integrity of the PREDIMED-Plus trial during and after the COVID-19 pandemic lockdown**

### **Supplemental Tables**

- **Supplemental Table 1. Integrity of the PREDIMED-Plus intervention in the different study centers during the COVID-19 Pandemic (mean reported percentages of participants receiving the invention)**
- **Supplemental Table 2. Participants with clinically meaningful changes**

## Supplemental Material 1. Questionnaire to assess the integrity of the PREDIMED-Plus trial during and after the COVID-19 pandemic

Center \_\_\_\_ Date: \_\_\_\_ / \_\_\_\_ / \_\_\_\_

PREVENCIÓN CON DIETA MEDITERRÁNEA

*predimed<sup>plus</sup>*

### Questionnaire to assess the integrity of the PREDIMED-Plus trial during and after the COVID-19 pandemic.

INSTRUCTIONS: The objective of this questionnaire is to estimate the influence of the sanitary measures applied from March 2020 to June 2021. Please read each question carefully and write down the answer that best describes the situation of your center in each 3-month period.

Please specify the mean **PERCENTAGE** of lockdown/prohibition (%) the participants of your center were affected by each study period: (0% = there was no lockdown in that period - 100% = there was complete restriction throughout the period - Please use only the percentages 25%, 50% and 75% for intermediate conditions)

| Periods→                                                                                                                                                               | 03/2020<br>05/2020 | 06/2020<br>08/2020 | 09/2020<br>12/2020 | 01/2021<br>03/2021 | 04/2021<br>06/2021 | Observations |
|------------------------------------------------------------------------------------------------------------------------------------------------------------------------|--------------------|--------------------|--------------------|--------------------|--------------------|--------------|
| Complete home lockdown                                                                                                                                                 |                    |                    |                    |                    |                    |              |
| Partial lockdown (county/provincial/autonomic)                                                                                                                         |                    |                    |                    |                    |                    |              |
| Night lockdown (curfew)                                                                                                                                                |                    |                    |                    |                    |                    |              |
| Prohibition of going for a walk with children or pets, or playing sports outdoors                                                                                      |                    |                    |                    |                    |                    |              |
| Prohibition of attending closed places: gymnasiums / civic centers / conferences/lessons in closed rooms / places of worship / cultural activities / shopping centers. |                    |                    |                    |                    |                    |              |
| Prohibition of holding private meetings of $\geq 2$ cohabiting persons                                                                                                 |                    |                    |                    |                    |                    |              |
| Complete prohibition of going to bars/restaurants.                                                                                                                     |                    |                    |                    |                    |                    |              |
| Prohibition of going to bars /restaurants indoors.                                                                                                                     |                    |                    |                    |                    |                    |              |

For each period, please indicate in which **PERCENTAGE** the different methods of **contact, data collection and intervention strategies** were used in your center: (0% = this method was not used – 100% Only used method – Please use only the percentages 25%, 50% and 75% for intermediate conditions)

| Periods→                                                                 | 03/2020<br>05/2020 | 06/2020<br>08/2020 | 09/2020<br>12/2020 | 01/2021<br>03/2021 | 04/2021<br>06/2021 | Observations |
|--------------------------------------------------------------------------|--------------------|--------------------|--------------------|--------------------|--------------------|--------------|
| Anthropometric measurements • measured in <b>face-to-face</b> interviews |                    |                    |                    |                    |                    |              |
| • <b>self-reported</b> by the participant ( <b>not</b> measured)         |                    |                    |                    |                    |                    |              |

|                                                                                                                               |  |  |  |  |  |  |
|-------------------------------------------------------------------------------------------------------------------------------|--|--|--|--|--|--|
| Individual delivery of nutritional and physical activity recommendations: • <b><u>In-person visit</u></b>                     |  |  |  |  |  |  |
| • by <b><u>telephone</u></b>                                                                                                  |  |  |  |  |  |  |
| • electronic media: <b>email, and social networks</b><br>Specify the type of material used: recipes, videos, PowerPoint, etc. |  |  |  |  |  |  |
| <b>Group sessions</b> • <b>face-to-face</b>                                                                                   |  |  |  |  |  |  |
| • by <b><u>videocalls</u></b>                                                                                                 |  |  |  |  |  |  |
| <b>Delivery of olive oil</b> (in time or delayed)                                                                             |  |  |  |  |  |  |
| <b>Collection of accelerometer data</b>                                                                                       |  |  |  |  |  |  |
| <b>Collection of blood samples</b>                                                                                            |  |  |  |  |  |  |
| <b>Collection of fecal and urine samples</b>                                                                                  |  |  |  |  |  |  |

**Supplemental Table 1. Integrity of the PREDIMED-Plus intervention in the different study centers during the COVID-19 Pandemic (mean reported percentages of participants receiving the intervention).**

| Center | Individual nutritional & physical activity recommendations |           |                  | Group sessions |             | Olive oil delivery | Anthropometric data collection |               | Collection of blood samples | Collection of fecal/urine samples | Accelerometer data collection |
|--------|------------------------------------------------------------|-----------|------------------|----------------|-------------|--------------------|--------------------------------|---------------|-----------------------------|-----------------------------------|-------------------------------|
|        | Face to face                                               | Telephone | Electronic media | Face to face   | Video calls |                    | Face to face                   | Self-reported |                             |                                   |                               |
| A      | 30 ± 27.4                                                  | 45 ± 27.4 | 25 ± 0           | 60 ± 54.8      | 0 ± 0       | 80 ± 44.7          | 65 ± 48.7                      | 35 ± 48.7     | 65 ± 48.7                   | 60 ± 54.8                         | 100 ± 0                       |
| B      | 20 ± 32.6                                                  | 65 ± 48.7 | 10 ± 22.4        | 0 ± 0          | 0 ± 0       | 20 ± 44.7          | 15 ± 33.5                      | 65 ± 48.7     | 0 ± 0                       | 0 ± 0                             | NA                            |
| C      | 5 ± 11.2                                                   | 70 ± 11.2 | 25 ± 0           | 5 ± 11.2       | 95 ± 11.2   | 80 ± 44.7          | 85 ± 33.5                      | 15 ± 33.5     | 80 ± 44.7                   | 80 ± 44.7                         | 80 ± 44.7                     |
| D      | 40 ± 41.8                                                  | 60 ± 41.8 | 45 ± 41.1        | 0 ± 0          | 100 ± 0     | 75 ± 0             | 100 ± 0                        | 0 ± 0         | 40 ± 22.4                   | 100 ± 0                           | 60 ± 41.8                     |
| E      | 80 ± 44.7                                                  | 20 ± 44.7 | 30 ± 41.1        | 0 ± 0          | 30 ± 41.1   | 80 ± 44.7          | 65 ± 48.7                      | 20 ± 44.7     | 80 ± 44.7                   | 80 ± 44.7                         | 0 ± 0                         |
| F      | 60 ± 37.9                                                  | 20 ± 32.6 | 45 ± 41.1        | 0 ± 0          | 0 ± 0       | 100 ± 0            | 60 ± 37.9                      | 20 ± 32.6     | 35 ± 37.9                   | 55 ± 37.1                         | 55 ± 37.1                     |
| G      | 80 ± 44.7                                                  | 20 ± 44.7 | 20 ± 44.7        | 0 ± 0          | 60 ± 54.8   | 100 ± 0            | 80 ± 44.7                      | 10 ± 22.4     | 45 ± 32.6                   | 80 ± 44.7                         | 80 ± 44.7                     |
| H      | 40 ± 37.9                                                  | 60 ± 37.9 | 5 ± 11.2         | 0 ± 0          | 80 ± 44.7   | 30 ± 20.9          | 40 ± 37.9                      | 60 ± 37.9     | 35 ± 37.9                   | 25 ± 25                           | 20 ± 27.4                     |
| I      | 15 ± 22.4                                                  | 40 ± 13.7 | 45 ± 11.2        | 15 ± 22.4      | 45 ± 44.7   | 60 ± 54.8          | 45 ± 32.6                      | 55 ± 32.6     | 45 ± 32.6                   | 45 ± 32.6                         | NA                            |
| J      | 5 ± 11.2                                                   | 70 ± 11.2 | 25 ± 0           | 5 ± 11.2       | 95 ± 11.2   | 80 ± 44.7          | 85 ± 33.5                      | 15 ± 33.5     | 80 ± 44.7                   | 80 ± 44.7                         | 60 ± 54.8                     |
| K      | 65 ± 22.4                                                  | 30 ± 11.2 | 5 ± 11.2         | 0 ± 0          | 50 ± 0      | 75 ± 0             | 70 ± 11.2                      | 30 ± 11.2     | 70 ± 11.2                   | 75 ± 0                            | 90 ± 13.7                     |
| L      | 65 ± 28.5                                                  | 10 ± 13.7 | 25 ± 17.7        | 60 ± 37.9      | 40 ± 37.9   | 100 ± 0            | 80 ± 30.6                      | 20 ± 32.6     | 70 ± 44.7                   | 60 ± 37.9                         | 5 ± 11.2                      |
| M      | 10 ± 22.4                                                  | 20 ± 11.2 | 50 ± 0           | 10 ± 22.4      | 0 ± 0       | 70 ± 41.1          | 55 ± 51.2                      | 55 ± 41.1     | 70 ± 41.1                   | 75 ± 43.3                         | 60 ± 33.5                     |
| N      | 50 ± 35.4                                                  | 35 ± 22.4 | 100 ± 0          | 30 ± 41.1      | 0 ± 0       | 60 ± 33.5          | 60 ± 33.5                      | 40 ± 33.5     | 60 ± 33.5                   | 60 ± 33.5                         | 60 ± 33.5                     |
| NY     | 55 ± 32.6                                                  | 40 ± 33.5 | 25 ± 43.3        | 20 ± 27.4      | 80 ± 27.4   | 65 ± 41.8          | 55 ± 32.6                      | 45 ± 32.6     | 65 ± 41.8                   | 65 ± 41.8                         | 65 ± 41.8                     |
| O      | 10 ± 13.7                                                  | 65 ± 13.7 | 25 ± 0           | 0 ± 0          | 100 ± 0     | 75 ± 0             | 50 ± 35.4                      | 35 ± 37.9     | 70 ± 41.1                   | 65 ± 37.9                         | 0 ± 0                         |
| P      | 15 ± 13.7                                                  | 50 ± 17.7 | 75 ± 17.7        | 0 ± 0          | 35 ± 48.7   | 40 ± 22.4          | 25 ± 17.7                      | 41 ± 20.1     | 55 ± 51.2                   | 55 ± 51.2                         | 0 ± 0                         |
| Q      | 60 ± 33.5                                                  | 40 ± 33.5 | 20 ± 44.7        | 20 ± 32.6      | 0 ± 0       | 25 ± 35.4          | 75 ± 43.3                      | 25 ± 43.3     | 80 ± 32.6                   | 85 ± 33.5                         | 65 ± 22.4                     |
| R      | 20 ± 44.7                                                  | 20 ± 44.7 | 20 ± 44.7        | 0 ± 0          | 100 ± 0     | 40 ± 22.4          | 80 ± 44.7                      | 20 ± 44.7     | 50 ± 30.6                   | 50 ± 30.6                         | 40 ± 22.4                     |
| S      | 65 ± 41.8                                                  | 35 ± 41.8 | 100 ± 0          | 0 ± 0          | 0 ± 0       | 100 ± 0            | 60 ± 37.9                      | 40 ± 37.9     | 80 ± 44.7                   | 80 ± 44.7                         | 20 ± 44.7                     |
| T      | 60 ± 45.4                                                  | 40 ± 45.4 | 25 ± 35.4        | 0 ± 0          | 100 ± 0     | 100 ± 0            | 60 ± 45.4                      | 40 ± 45.4     | 60 ± 45.4                   | 55 ± 41.1                         | 45 ± 41.1                     |
| U      | 65 ± 48.7                                                  | 25 ± 35.4 | 10 ± 22.4        | 0 ± 0          | 0 ± 0       | 40 ± 54.8          | 65 ± 48.7                      | 35 ± 48.7     | 30 ± 32.6                   | 15 ± 13.7                         | NA                            |
| V      | 15 ± 13.7                                                  | 35 ± 13.7 | 50 ± 0           | 0 ± 0          | 100 ± 0     | 100 ± 0            | 35 ± 37.9                      | 65 ± 37.9     | 40 ± 54.8                   | 40 ± 54.8                         | 50 ± 46.8                     |

Data are expressed as mean ± SD. Data represent the means estimated from the reported percentages during the 5 study periods (March 2020 to June 2021).

\*NA: Not applicable, accelerometer data are not collected in these centers.

**Supplemental Table 2. Participants with clinically meaningful changes**

|                     | No. (%) Reduction $\geq 5\%$ |            |            | Increase $> 5\%$ |            |            |
|---------------------|------------------------------|------------|------------|------------------|------------|------------|
|                     | Full sample                  | Group A    | Group B    | Full sample      | Group A    | Group B    |
| Body weight change  |                              |            |            |                  |            |            |
| During lockdown     | 398 (9.5)                    | 182 (8.9)  | 216 (10.0) | 301 (7.2)        | 133 (6.5)  | 168 (7.8)  |
| Post lockdown       | 534 (13.0)                   | 249 (12.5) | 285 (13.5) | 419 (10.0)       | 179 (8.7)  | 240 (11.1) |
| Body mass index     |                              |            |            |                  |            |            |
| During lockdown     | 380 (9.7)                    | 176 (9.3)  | 204 (10.1) | 333 (8.5)        | 153 (8.0)  | 180 (8.9)  |
| Post lockdown       | 523 (13.4)                   | 246 (13.0) | 277 (13.8) | 463 (11.8)       | 198 (10.4) | 265 (13.2) |
| Waist circumference |                              |            |            |                  |            |            |
| During lockdown     | 198 (6.4)                    | 80 (5.3)   | 118 (7.4)  | 331 (10.7)       | 146 (9.6)  | 185 (11.6) |
| Post lockdown       | 278 (8.9)                    | 114 (7.5)  | 164 (10.2) | 428 (13.7)       | 199 (13.1) | 229 (14.3) |
